# Supplementary material for: Adipocyte-specific blockade of gamma-secretase, but not inhibition of Notch activity, reduces adipose insulin sensitivity
Source: PubMed Central journal article supplement (PMC4735659; doi:10.1016/j.molmet.2015.11.006), 2015-12-02

# Supplementary Figure 1

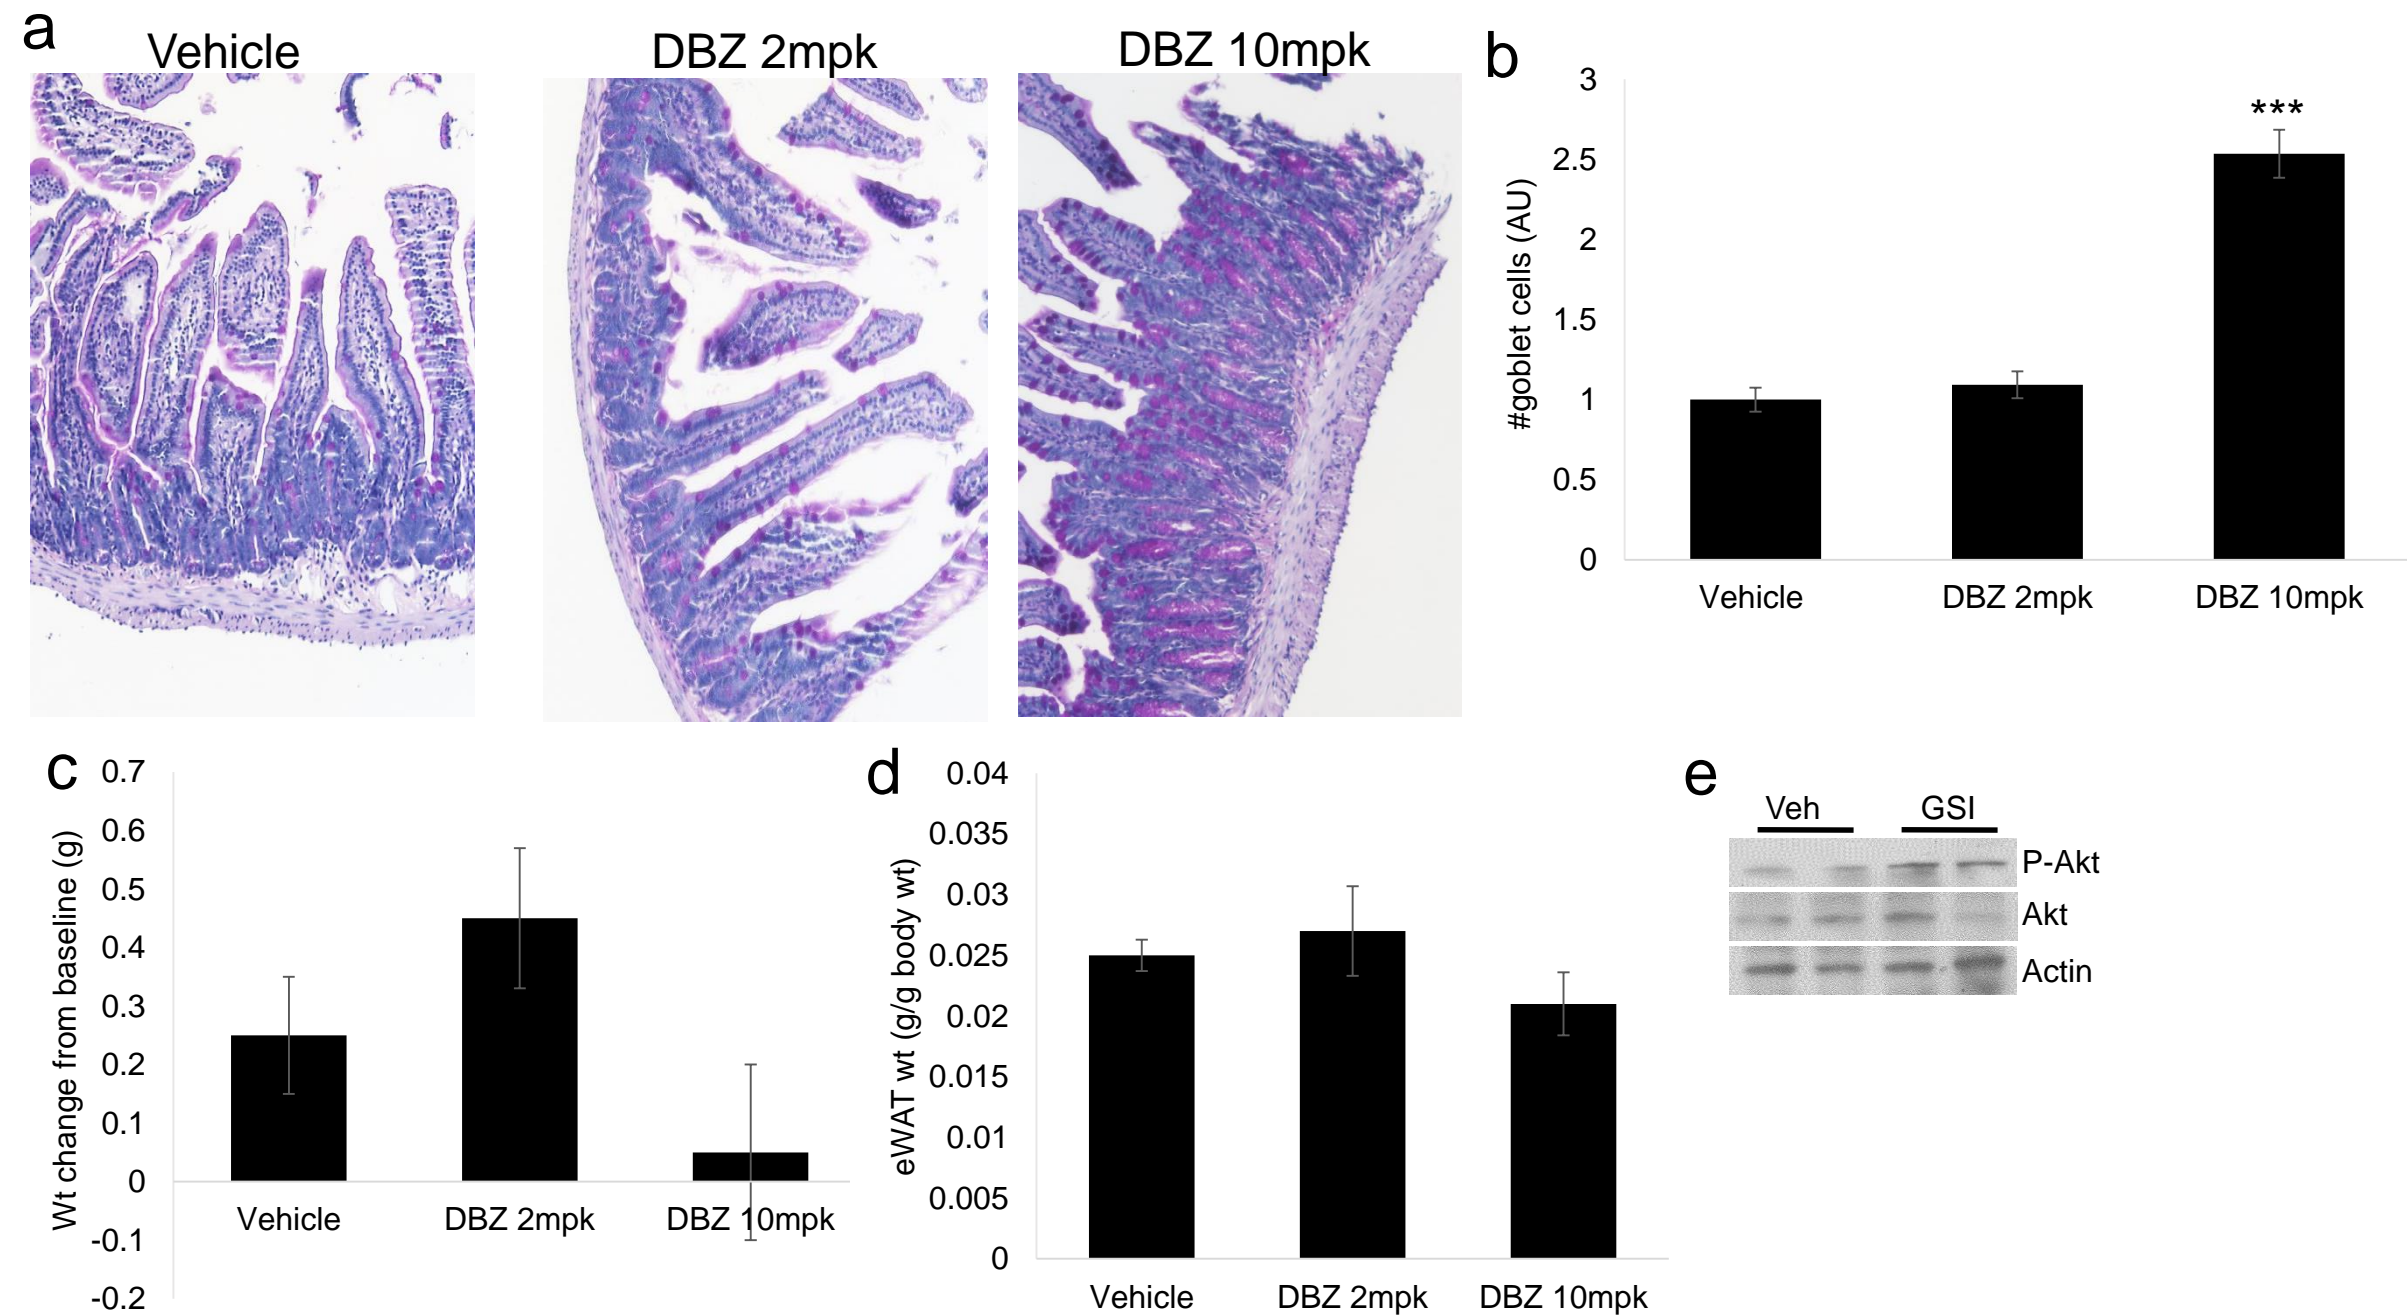

# Supplementary Figure 2

Compound E

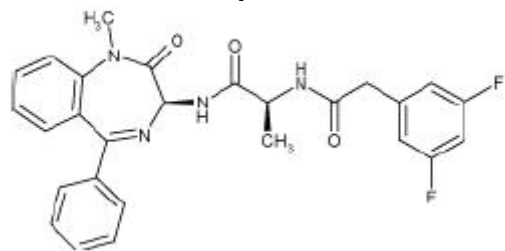

DBZ

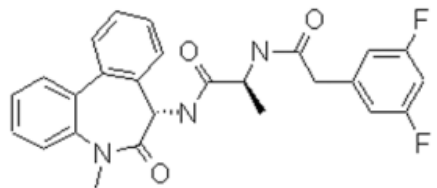

# Supplementary Figure 3

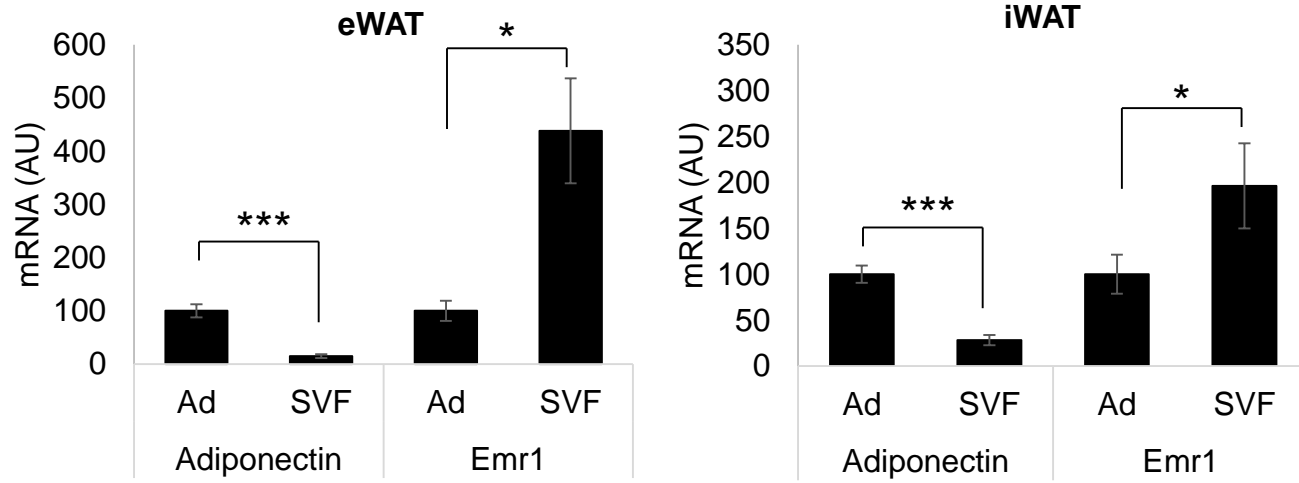

# Supplementary Figure 4

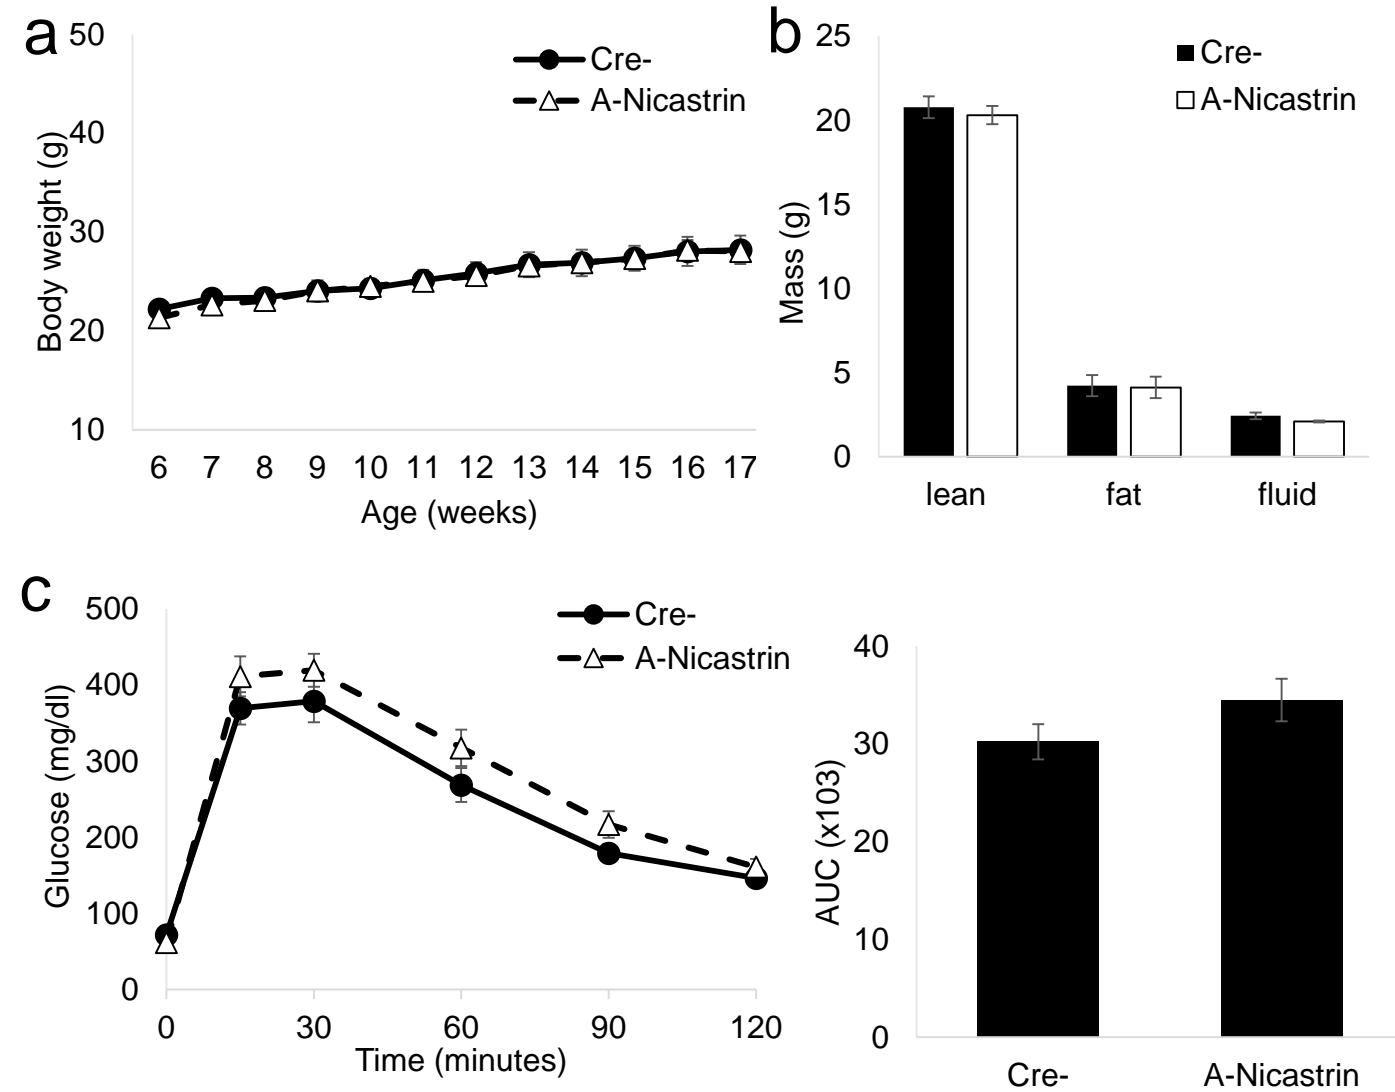

# Supplementary Figure 5

**a**

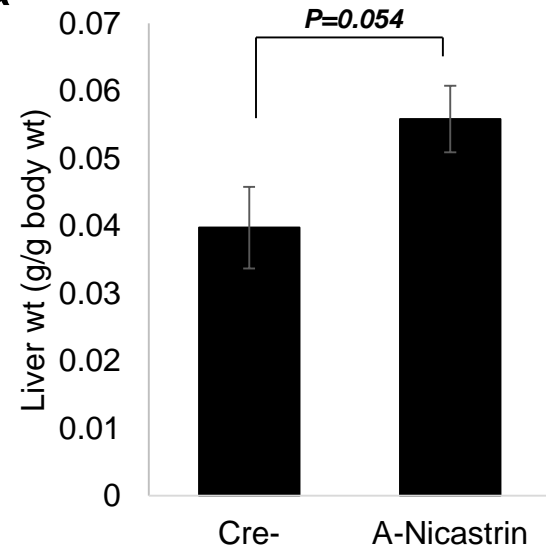

**b**

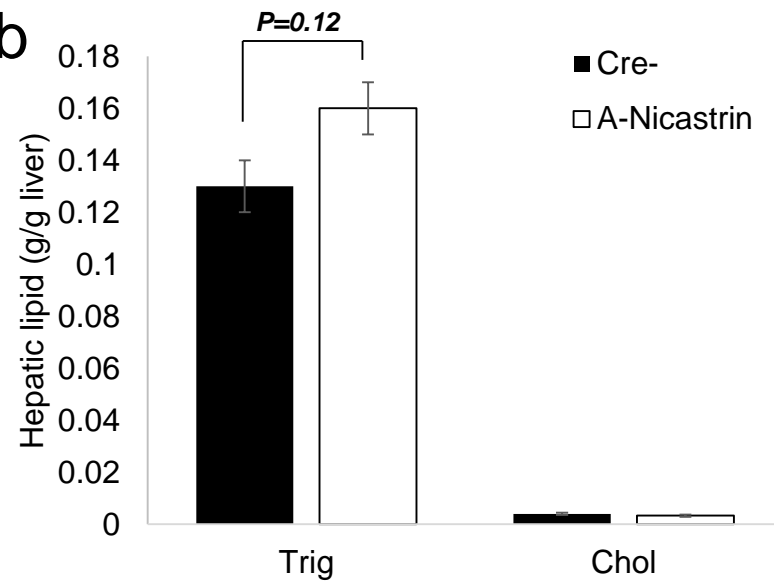

**c**

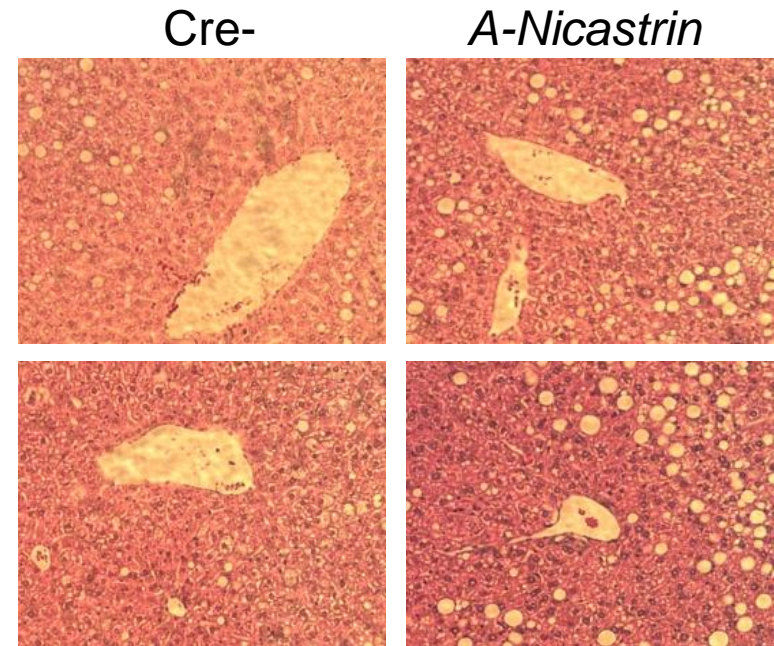

Supplement: mmc1.pdf [file mmc1.pdf]
